# Supplementary material
Source: PubMed Central journal article supplement (PMC7833293)
Supplement: mmc1.pdf [file mmc1.pdf]

**Cell Reports, Volume 33**

**Supplemental Information**

**Heterogeneous Escape from X Chromosome**

**Inactivation Results in Sex Differences in Type I**

**IFN Responses at the Single Human pDC Level**

**Sven Hendrik Hagen, Florian Henseling, Jana Hennesen, H  l  ne Savel, Solenne Delahaye, Laura Richert, Susanne Maria Ziegler, and Marcus Altfeld**

## Supplemental Figure S1

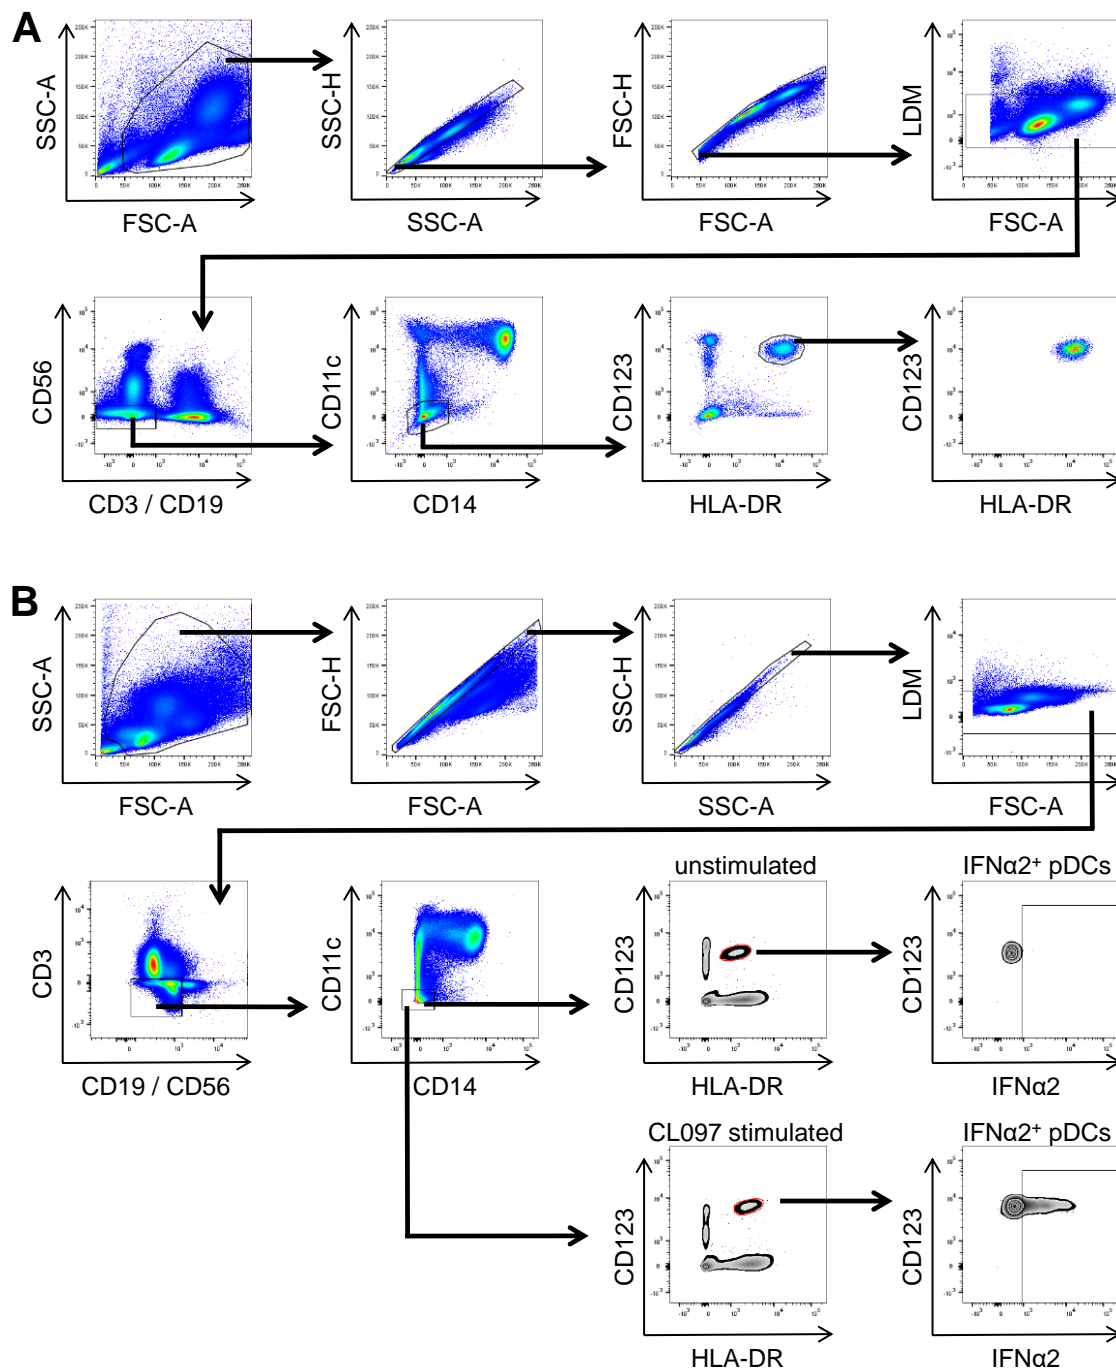

**Figure S1. Gating strategy for identifying pDCs. Related to Figures 1B and S4.**

(A) Gating strategy for identification of pDCs is shown in one representative plot. Using FSC-H and SSC-H single cells were selected. pDCs were defined as live and CD3-CD19-CD56-CD11c-CD14-CD123+HLA-DR+. pDCs were sorted from PBMCs or isolated pDCs based on this gating. This gating was also used for the assessment of TLR7 protein levels in pDCs. LDM: live-dead marker. (B) Gating strategy for identification of cytokine<sup>+</sup> pDCs is shown in one representative plot. Using FSC-H and SSC-H single cells were selected. pDCs were defined as live and CD3-CD19-CD56-CD11c-CD14-CD123+HLA-DR+. An unstimulated sample (but BFA treated sample) was used to define the threshold for cytokine<sup>+</sup> pDCs, with the example showing IFNα2 that was quantified with the clone 7N4-1 (BD) that primarily detects IFNα2. LDM: live-dead marker.

## Supplemental Figure S2

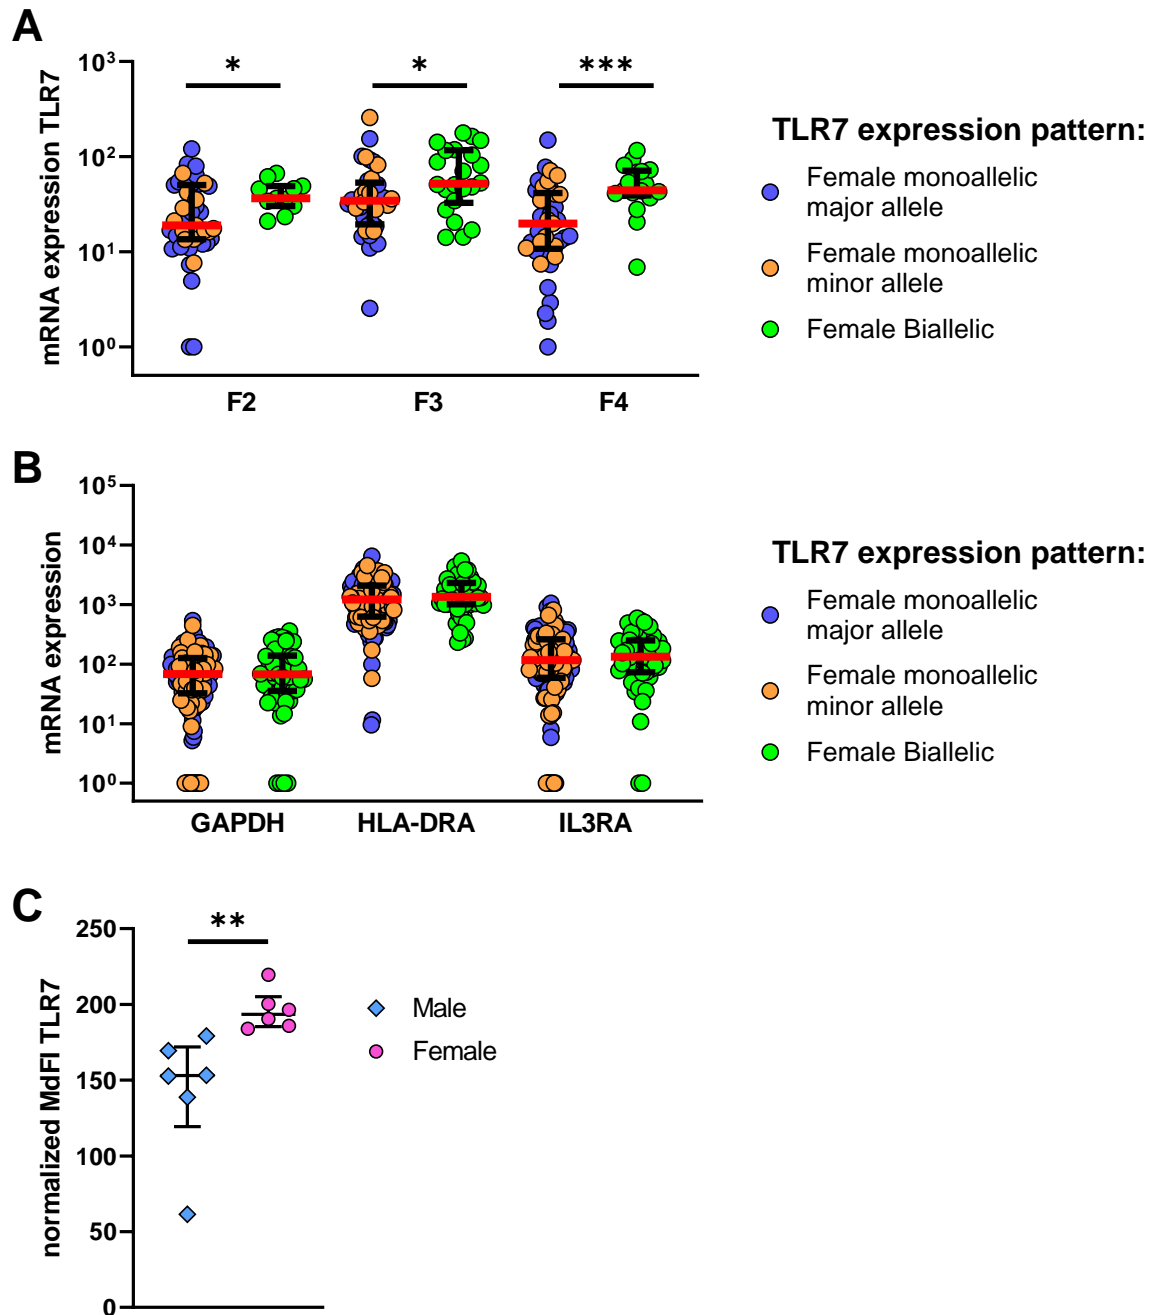

**Figure S2. mRNA expression levels of TLR7 and mRNA expression of GAPDH, HLA-DR, IL3RA comparing monoallelic and biallelic TLR7-expressing pDCs. Related to Figure 4.** (A) mRNA expression levels of TLR7 between female monoallelic (orange and blue circles) and female biallelic expressing pDCs (green circles) separately for F2, F3 and F4. Median (red bar) with interquartile range (black bars) is shown. Mann–Whitney test was used for statistical analysis. F = female. \* $p < 0.05$ ; \*\*\* $p < 0.001$  (B) mRNA expression levels of GAPDH, HLA-DR and IL3RA (CD123) between female monoallelic (orange and blue circles) and female biallelic TLR7-expressing pDCs (green circles).  $n = 3$  females. Median (red bars) with interquartile range (black bars) is shown. A mixed effects linear regression model with a random intercept was used to take into account the intra-sample correlations. (C) PBMCs from females ( $n = 6$ ) and males ( $n = 6$ ) were stained and pDCs were identified according to gating strategy in **Figure S1A**. TLR7 protein levels were determined via intracellular staining. The

median fluorescent intensity (MdfI) of TLR7 from pDCs was normalized to the MdfI of a corresponding FMO control of the same donor (MdfI TLR7 / MdfI FMO). Median with interquartile range is shown. Mann–Whitney test was used for statistical analysis. \*\*p < 0.01.

## Supplemental Figure S3

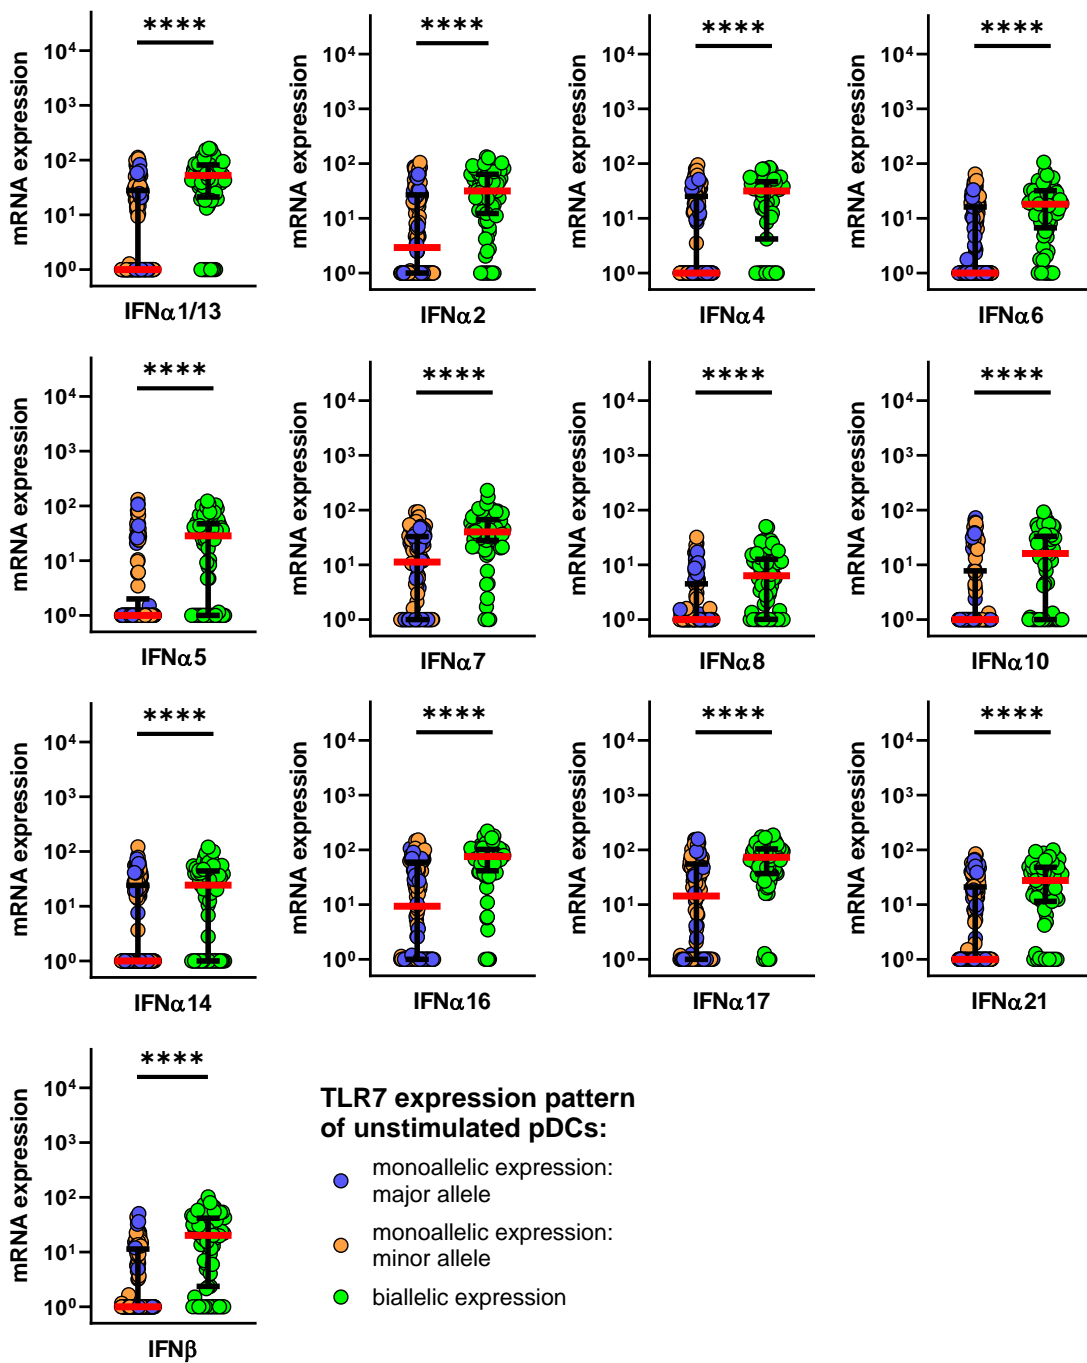

**Figure S3. pDCs with biallelic expression of TLR7 have significantly higher mRNA levels of all IFN $\alpha$  subtypes and IFN $\beta$ . Related to Figure 5A.**

Comparison of mRNA expression levels of isolated, unstimulated pDCs for all IFN $\alpha$  subtypes and IFN $\beta$  separately. Female monoallelic TLR7-expressing pDCs (blue circles = monoallelic expression of the major allele; orange circles = monoallelic expression of the minor allele) and female biallelic TLR7-expressing pDCs (green circles = pDCs with escape of *TLR7* from XCI) are shown. Expression patterns were determined using the following TLR7 SNP: rs3853839. Individual pDCs from n = 3 females are displayed. Median (red bar) with interquartile range (black bars) is shown. A mixed effects linear regression model with a random intercept was used to take into account intra-sample correlations. \*\*\*\*p < 0.0001.

Supplemental Figure S4

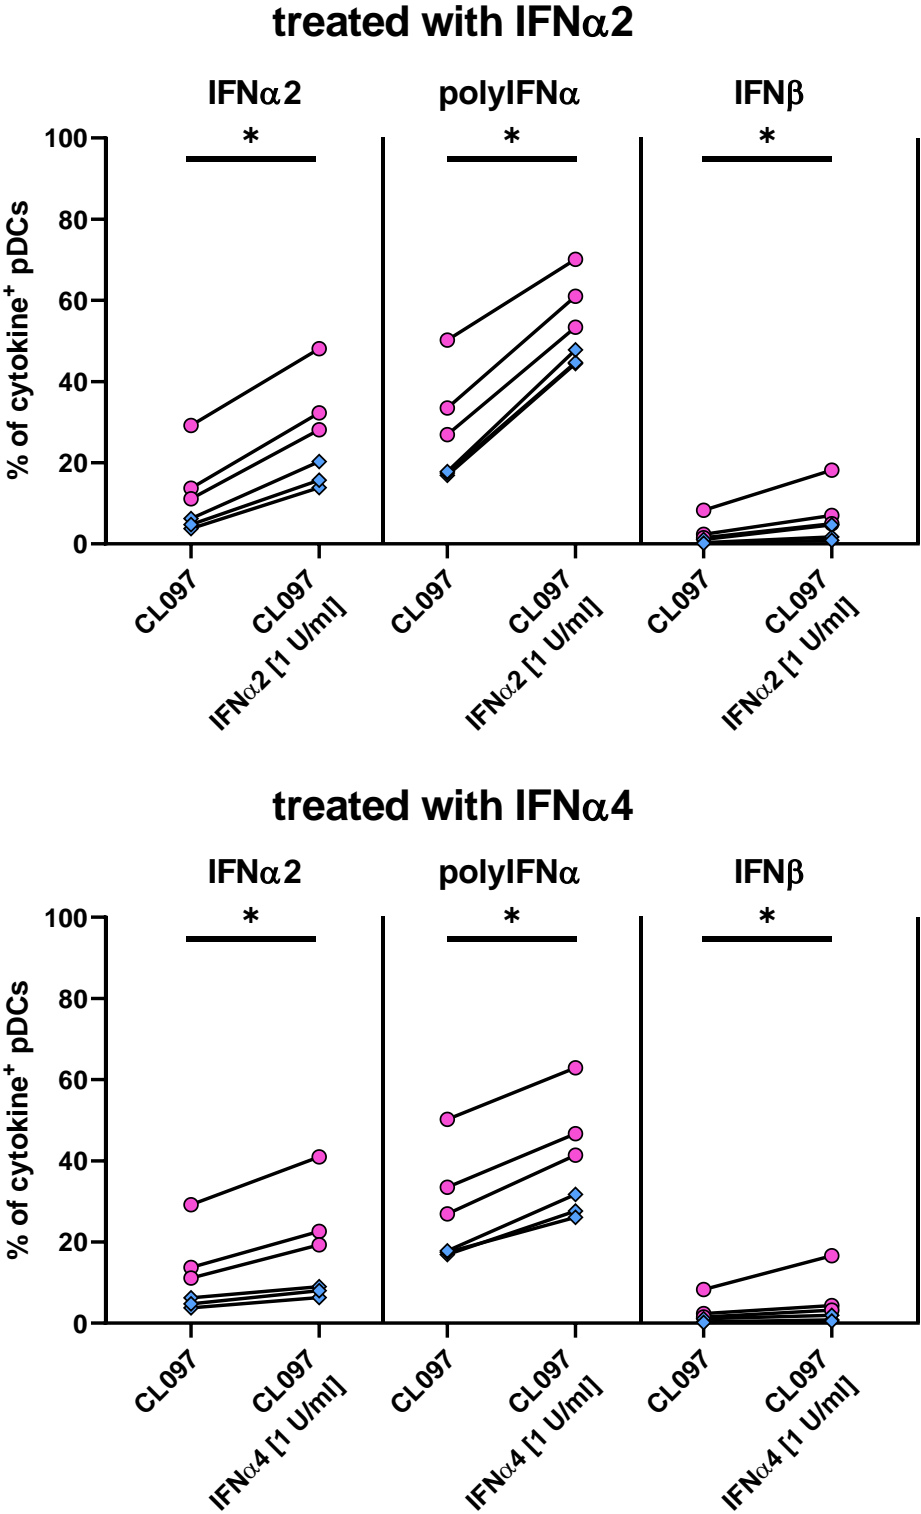

**Figure S4. Effect of pre-treatment of PBMCs with IFN $\alpha$ 2 and IFN $\alpha$ 4 protein on IFN $\alpha$ / $\beta$  protein production by human pDCs. Related to Figure 5E.** Comparing the percentage of cytokine<sup>+</sup> pDCs determined through intracellular cytokine staining (ICS). Gating strategy is shown in **Figure S1B**. PBMCs were incubated for 2 h in R10 (CL097) or in R10 with the indicated U of IFN $\alpha$ 2 or IFN $\alpha$ 4, before being stimulated with

CL097. IFN $\alpha$ 2 was quantified with clone 7N4-1 (BD) which primarily detects IFN $\alpha$ 2. PolyIFN $\alpha$  was quantified with clone LT27:295 (Miltenyi Biotec), which detects IFN $\alpha$ 2 and several other IFN $\alpha$  subtypes. n = 3 females (pink circles) and n = 3 males (blue squares) were used. Female results are shown independent of TLR7 expression pattern. Wilcoxon signed rank test was used for statistical analysis. \*p < 0.05.

## Supplemental Tables

**Table S1. Overview of genes and corresponding SNPs used to investigate escape from XCI in this study. Related to Figure 1A.**

Information was obtained from the Ensembl genome database project (ensembl.org).  
 SNP = single nucleotide polymorphism; F = female; MAF = minor allele frequency.

| Gene           | Location of the gene [Mbp] | refSNP ID | Nucleotide Exchange | Location of SNP in mRNA | MAF   | n | Individuals        |
|----------------|----------------------------|-----------|---------------------|-------------------------|-------|---|--------------------|
| <i>TLR7</i>    | 12.867 – 12.890            | rs3853839 | C > G               | 3' UTR                  | 40.2% | 3 | F2, F3, F4         |
| <i>RPS6KA3</i> | 20.150 – 20.268            | rs7051161 | T > A               | 3' UTR                  | 25.0% | 3 | F3, F4, F5         |
| <i>CYBB</i>    | 37.780 – 37.813            | rs5964151 | T > G               | 3' UTR                  | 20.4% | 2 | F1, F3             |
| <i>BTK</i>     | 101.349 – 101.391          | rs700     | T > G               | 3' UTR                  | 26.9% | 5 | F1, F2, F3, F4, F5 |
| <i>IL13RA1</i> | 118.727 – 118.795          | rs2495636 | A > G               | 3' UTR                  | 25.6% | 2 | F1, F5             |



**Table S2. Oligonucleotides used for pre-amplification of SNP regions. Related to Key resources table for oligonucleotides.**

| Gene           | Forward Primer              | Reverse Primer           |
|----------------|-----------------------------|--------------------------|
| <i>BTK</i>     | GGAGCCCTGGAGCCTT            | TCAGTCTGTCTTAATTCTCTCGGG |
| <i>CYBB</i>    | AAGGAAATTTTCCAGATCATTAGGACA | CCCAGTTACCCTGCTGTATTAGTA |
| <i>IL13RA1</i> | CACTGTGACCTTGAGAAGATTC      | GCTCTTATGAGCTGCCTGTTTT   |
| <i>RPS6KA3</i> | GTAGAAAGCCTTCCATTTTGTGAAC   | TCGAAGATAATTGCCTTCTTTGCC |
| <i>TLR7</i>    | TGGGCACCACACAGGT            | CTGTTTCCCTATGGAACCCAGAA  |

**Table S3. Oligonucleotides used for pre-amplification and real-time quantitative PCR. Related to Key resources table for oligonucleotides.**

| Gene            | Forward Primer              | Reverse Primer           |
|-----------------|-----------------------------|--------------------------|
| <i>B2M</i>      | TTAGCTGTGCTCGCGCTAC         | CTCTGCTGGATGACGTGAGTAA   |
| <i>BTK</i>      | CCTCTCTACATCTGGGAATGCA      | TGCTCAGAAGCCACTATCCC     |
| <i>CYBB</i>     | GAGAGTGTCTCAACACTTATTAGTGAC | CCCAGTTACCCTGCTGTATTAGTA |
| <i>GAPDH</i>    | GAACGGGAAGCTTGTCATCAA       | ATCGCCCCACTTGATTTTGG     |
| <i>HLA-DRA</i>  | CGCTCAGGAATCATGGGCTA        | CGCCTGATTGGTCAGGATTCA    |
| <i>IFNA1/13</i> | GCCTCGCCCTTTGCTTTAC         | TGTGGGTCTCAGGGAGATCA     |
| <i>IFNA10</i>   | CTATAACCACGACGCGTTGAA       | AGTGCCTGCACAGGTATAACA    |
| <i>IFNA14</i>   | CAAGTCAAGCTGCTCTCTGG        | TGCCATGAGCATCAAAGTCC     |
| <i>IFNA16</i>   | CCATCCTGGCTGTGAGGAAA        | GCACAAGGGCTGTATTTCTTCC   |
| <i>IFNA17</i>   | ACCACCACGAGTTGAATCAAAA      | ACTAGTGCCTGCACAGGTAT     |
| <i>IFNA2</i>    | CCTGGCACAGATGAGGAGAA        | CCAAACTCCTCCTGGGGAAA     |
| <i>IFNA21</i>   | TGGAAGCCTGCGTGATACA         | CCAGGATGGAGTCCACATTCA    |
| <i>IFNA4</i>    | CACTTCTATAACCACCACGAGTTG    | TGCACAGGTATACACCAAGCT    |
| <i>IFNA5</i>    | GTGGAAGACACTCCTCTGATGAA     | CTCTGACAACCTCCCATGCA     |
| <i>IFNA6</i>    | GGAGGAGTTTGATGGCAACC        | AGGTCTGCTGAATCACCTCA     |
| <i>IFNA7</i>    | CTCCTGCTTGAAGGACAGACA       | TGGAACTGGTGGCCATCAAAA    |
| <i>IFNA8</i>    | TGGTGCTCAGCTACAAGTCA        | ATCAAGGCCCTCCTGTTACC     |
| <i>IFNB1</i>    | GCTTGAATACTGCCTCAAGGAC      | GAAGTCTGCAGCTGCTTAA      |
| <i>IL13RA1</i>  | CACTGTGACCTTGAGAAGATTC      | GGTGCAGTAGTTTCAGTTTCC    |
| <i>IL3RA</i>    | CTGGTCTGTGTCTTCGTGATCT      | GTGAGGGATGCGGGGAAA       |
| <i>RPL13A</i>   | GAGGCCCTACCACTTCC           | GCCGTCAAACACCTTGAGAC     |
| <i>RPS6KA3</i>  | GTAGAAAGCCTTCCATTTTGTGAAC   | ATTGCCTTCTTTGCCTAGCC     |
| <i>TLR7</i>     | ACAGGTGGTTGCTGCTTCA         | CTGTTTCCCTATGGAACCCAGAA  |
| <i>XIST</i>     | TTGGATGGGTTGCCAGCTA         | TCTCCACCTAGGGATCGTCAA    |

**Table S4. Oligonucleotides used for SNPTyping of gDNA and mRNA. Related to Key resources table for oligonucleotides.**

| Gene           | SNP       | Forward Primers                                            | Reverse Primer                 |
|----------------|-----------|------------------------------------------------------------|--------------------------------|
| <i>BTK</i>     | rs700     | CTTTGTGCTCCCACTCAATACAA<br>CTTTGTGCTCCCACTCAATACAC         | TGCTCAGAAGCCACTATCCCAG         |
| <i>CYBB</i>    | rs5964151 | ACATGTTGAGAGTGTCTCAACACTTAT<br>ACATGTTGAGAGTGTCTCAACACTTAG | GGAGTATGCTCAGATGTCAATACTGTCA   |
| <i>IL13RA1</i> | rs2495636 | GGTGCAGTAGTTTCAGTTTCCATT<br>GGTGCAGTAGTTTCAGTTTCCATC       | CCCATTCTCCATTTGTTATCTGGGAAC    |
| <i>RPS6KA3</i> | rs7051161 | GCCTAGCCAAGCAGCCAA<br>GCCTAGCCAAGCAGCCAT                   | GCCTTCCATTTTGTGAACATATAACTTGCT |
| <i>TLR7</i>    | rs3853839 | CTTCAGTGCTTCCTGCTCTTTTTTC<br>CTTCAGTGCTTCCTGCTCTTTTTG      | CTATGGAACCCAGAAGCAGGC          |
